1 **SARS-CoV-2 testing of aircraft wastewater shows that mandatory tests and vaccination**  
2 **pass before boarding did not prevent massive importation of Omicron variant in Europe**

3

4 Lorlane Le Targa<sup>1,2,3</sup>, Nathalie Wurtz<sup>1,2</sup>, Alexandre Lacoste<sup>4</sup>, Gwilherm Penant<sup>1,2</sup>, Priscilla  
5 Jardot<sup>1,2</sup>, Alexandre Annessi<sup>4</sup>, Philippe Colson<sup>1,2</sup>, Bernard La Scola<sup>1,2\*</sup>, Sarah Aherfi<sup>1,2\*</sup>

6

7 **Affiliations:**

8 <sup>1</sup> MEPHI, Institut de Recherche pour le Développement (IRD), Assistance Publique -  
9 Hôpitaux de Marseille (AP-HM), Aix-Marseille Université, Marseille, France

10 <sup>2</sup> IHU Méditerranée Infection, Marseille, France

11 <sup>3</sup> Biosellal

12 <sup>4</sup> Bataillon des Marins Pompiers de la ville de Marseille, Marseille, France

13

14

15 **\* Corresponding authors:**

16 Sarah Aherfi, IHU - Méditerranée Infection, 19-21 boulevard Jean Moulin, 13005 Marseille,  
17 France. Tel.: +33 413 732 401, Fax: +33 413 732 402; email: [aherfi.s@gmail.com](mailto:aherfi.s@gmail.com)

18 Bernard La Scola, IHU - Méditerranée Infection, AP-HM, 19-21 boulevard Jean Moulin,  
19 13005 Marseille, France. Tel.: +33 413 732 401, Fax: +33 413 732 052; email:

20

21 **KEYWORDS: SARS-CoV2, wastewater monitoring, variants spreading, aircraft,**  
22 **surveillance**

23 **ABSTRACT (200 words)**

24 Background : Most new SARS-CoV-2 epidemics in France occurred following importation  
25 from abroad of emerging viral variants. Currently, the control of such risk of new variant  
26 importation is based on the negativity of a screening test (PCR or antigenic) and on an up-to-  
27 date vaccine status, such as International Air Transport Association travel pass.

28 Methods: Wastewater of 2 planes arriving in Marseille (France) from Addis-Ababa (Ethiopia)  
29 on December 2021 were i) tested by RT-PCR for SARS-CoV2 detection, and variants  
30 screening; these tests were carried out between landing and custom clearance, ii)sequenced by  
31 MiSeq Illumina.

32 Antigenic tests and sequencing by NovaSeq were carried out on respiratory samples collected  
33 from the 56 passengers of the second flight.

34 Results: SARS-CoV-2 RNA suspected of being from the Omicron BA.1 variant was detected  
35 on the aircraft's wastewater. ,

36 SARS-CoV2 RNA was detected for 11 (20%) passengers and the Omicron BA.1 variant was  
37 identified.

38 Conclusion: Our work shows the efficiency of aircraft wastewater testing to detect SARS-  
39 CoV-2 cases among travelers and identify the viral genotype. It also highlights the low  
40 performance for incoming flights from outside Europe to France of the current filter strategy  
41 that combines requirement for a vaccine pass and a negative testing before boarding.

42

43 **MAIN TEXT (2752 words)**

44 **Introduction**

45 Coronavirus disease-2019 (COVID-19), caused by the Severe Acute Respiratory  
46 Syndrome – Coronavirus 2 (SARS-COV-2), emerged in Wuhan (China) in December 2019  
47 and since then became a pandemic with more than 336 million confirmed cases globally and  
48 5.5 million deaths as of January 20, 2022 . Most SARS-CoV-2 epidemics that occurred  
49 successively or concurrently at the level of countries resulted from the importation from  
50 abroad of emerging viral variants [1]. Indeed, air travel and boat cruise have been associated  
51 with the spread of SARS-CoV-2 including of new variants via infected passengers. Since the  
52 beginning of the COVID-19 pandemic, many countries and regions imposed restrictions, for  
53 example quarantines, entry bans, obligation of vaccination, or travel restrictions. To know the  
54 restrictions imposed in each country, the International Air Transport Association (IATA)  
55 developed a COVID-19 Travel Regulations Map (powered by Timatic), which gives in real  
56 time the requirements according to the itinerary with certainty for anywhere in the world

57 (<https://www.iatatravelcentre.com/world.php>). Previous studies have examined the effect of  
58 travel restrictions and travel-related measures imposed during the pandemic. Most of these  
59 studies focused on the initial phase of the COVID-19 spread, when the epidemic was  
60 concentrated in Wuhan (China) [2;3]. All of these studies found that travel restrictions in the  
61 early part of the epidemic helped to delay the spread of COVID-19. Other studies found that  
62 the restrictions were insufficient to control the global spread completely [4;5]. With the  
63 emergence of new SARS-CoV-2 variants, many countries have strengthened border control  
64 measures, with pre-travel and post-travel screening tests, to avoid their importation. In the last  
65 months, new variants had spread worldwide including most recently the Omicron variant that  
66 was first described in South Africa and Botswana [6]. Its clinical manifestations are similar to  
67 those of other respiratory viral infections with dry cough, fever, tiredness, myalgia and  
68 difficulty to breath [6], but can also include gastrointestinal symptoms such as diarrhea,  
69 nausea, abdominal pain and vomiting in 2-10 % of cases [7]. High concentrations of SARS-  
70 CoV-2 RNA have been found in stools of infected asymptomatic and symptomatic people [8]  
71 and viruses were still infectious [9]. Therefore, analysis of SARS-CoV-2 in wastewater  
72 appears an interesting approach to monitor the disease burden in communities. After the first  
73 report of the detection of SARS-CoV-2 in wastewater by Medema et al. in Netherlands [10],  
74 detection and monitoring in wastewater samples have been reported in many countries [11-  
75 14]. A few studies have performed SARS-CoV-2 genome sequencing from sewage to identify  
76 viral genotypes circulating in a community and study genetic diversity [14-19]. Some of them  
77 showed congruence between variants found in clinical isolates during the same period, while  
78 others identified genotypes not yet reported in clinical samples.

79       Until now, one study showed early in the pandemic that SARS-CoV-2 RNA was  
80 detected in wastewater from passenger aircraft [20;21] and this surveillance demonstrated a  
81 high positive predictive value for SARS-CoV-2 infection among people [22]. Only one study  
82 recently reported the successful detection by genome sequencing of variants in aircraft  
83 wastewater [23]. In the current study, we report the detection of SARS-CoV-2 variants in  
84 wastewater of aircrafts travelling from Addis Abeba, Ethiopia, to France. Two methods  
85 including full-length genome sequencing and real time reverse transcription (RT)-PCR  
86 (qPCR) to detect different variants by using the Bio-T Kit® FiveStar Covid-19 (Biosellal,  
87 Dardilly, France) were used. The high concentration of the Omicron variant in aircraft  
88 wastewater that was confirmed by antigenic testing of travelers shows massive importation of  
89 the Omicron variant in France from Africa. This confirms that the surveillance of aircraft  
90 wastewater provides precious public health information on the global spread of emerging

91 SARS-CoV-2 variants and shows that production of a negative SARS-CoV-2 detection test  
92 before boarding does not guarantee that passengers are not viral carriers.

93

## 94 **MATERIALS AND METHODS**

### 95 **Samples**

96 A volume of 100 mL of aircraft wastewater samples from 2 flights arriving from  
97 Addis Abeba (Ethiopia) to Marseille (France) on December 22<sup>nd</sup> and 24<sup>th</sup> (identified as 2212  
98 and 2412 respectively) were collected on the aircraft of the airport tarmac by the bataillon des  
99 marins pompiers de Marseille (BMPM), and then stored at 5°C until the arrival at the  
100 laboratory. Samples were first passed through a paper filter to remove large particles, then a  
101 volume of 30 mL of the filtrate was filtered on a Millex sterile syringe filter with a pore size  
102 of 5 µm (SLSV025LS, Merck Millipore, MA, USA).

103 For the flight of December 24<sup>th</sup>, 2021, all passengers were proposed to have a  
104 nasopharyngeal swab sampled for SARS-CoV-2 detection according to a joint initiative of the  
105 regional prefecture and the regional health agency and according to decree No. 2020-551 of  
106 12 May 2020 on the information systems mentioned in Article 11 of Law No. 2020-546 of 11  
107 May 2020 extending the state of health emergency for people arriving from countries  
108 classified at risk if the virus circulates actively [24]. These nasopharyngeal swabs were  
109 sampled by the staff of BMPM for 56 passengers and tested by a rapid antigenic diagnosis test  
110 COVID-VIRO®, AAZ (Boulogne-Billancourt, France). For all patients tested positive,  
111 samples were supplied to our laboratory at +4°C for further RT-PCR and sequencing.

112

### 113 **Nucleic acids extraction**

114 For wastewater sample, before DNA/RNA extraction, 10µL of Bio-T Kit® FiveStar  
115 Covid-19 internal positive control (Biosellal, Dardilly, France) and 10 µL of magnetic silica  
116 are added in each sample. Nucleic acids from 1mL of each wastewater sample were extracted  
117 with the eGENE-UP® Lysis and RNA/DNA Purification (Biomérieux, Marcy l'Etoile, France)  
118 to obtain a volume of 100µL of eluate. Negative control consisted in RNase Free water  
119 extracted following the same protocol.

120 For clinical samples, viral RNAs were extracted using the KingFisher Flex system  
121 (Thermo Fisher Scientific, Waltham, MA, USA) following the manufacturer's  
122 recommendations.

123

### 124 **RT-PCR detection and variants screening**

125 Direct Screening of SARS-CoV-2 variants in wastewater was performed on a RT-PCR  
126 Quantstudio5 device (Thermofisher, France) by using combination of the Bio-T Kit FiveStar  
127 Covid-19 and the Bio-T kit "Environmental Δ & O" (Biosellal, Dardilly, France).  
128 Confirmation of SARS-CoV-2 positivity attested by antigenic test in patients was  
129 confirmed by RT-PCR as previously described [25].

130

### 131 **Samples preparation for NGS sequencing**

132 The first RNA/DNA extract from the sample 2212 was used without pre-treatment for  
133 further RT-PCR. For the sample 2412, 1 mL was freeze-dried then rehydrated in 30 µL of  
134 water. The reverse transcription step was performed in duplicate with the SuperScript VILO  
135 cDNA synthesis kit (11754-250, Thermo Fisher, Waltham, MA, USA) according to the  
136 supplier's recommendations in a final volume of 20 µL per reaction. The ARTIC v3 PCR  
137 (ARTIC nCoV-2019 V3 Panel and 500rxn of IDT 10006788, Integrated DNA Technologies,  
138 Inc., Coralville, IA, USA) was carried out under the following conditions for one reaction for  
139 each of the pools 1 and 2: 2.5 µL of reaction Mix 10X, 0.5 µL dNTP (10 mM), 0.4 µL of  
140 forward primer (100 nM), 0.125 µL of HotStart qDNA Polymerase (Qiagen 203205, Hilden,  
141 Germany), water PCR grade (qsp 25µL) and 2 µL of template. Eight replicates were made per  
142 extract and per pool. The 8 replicates were then pooled (final volume of 200 µL) before  
143 purification on a Nucleofast 96 plates (Macherey Nagel ref 743100.50, Hoerd, France). The  
144 purification products were eluted in 30 µL of TE 1X then placed on a 2% agarose gel  
145 (migration for 30 minutes, 100 V). The 400 base pair (bp) bands were cut out of the gel and  
146 purified according to the supplier protocol with the Monarch DNA Gel Extraction Kit (New  
147 England BioLabs, ref T1020L, Evry-Courcouronnes, France) with a final elution volume of  
148 40µL.

149 For passengers' samples, cDNA were amplified using with the Illumina COVIDSeq  
150 protocol including a multiplex PCR protocol with ARTIC nCoV-2019 V3 Panel primers  
151 (Integrated DNA technologies) according to the ARTIC procedure (<https://artic.network/>).

152

### 153 **NGS sequencing**

154 For wastewater samples, final purification products were sequenced with the paired-  
155 end strategy with the Nextera XT DNA sample preparation kit (Illumina Inc, San Diego, CA,  
156 USA). These samples were barcoded for mixing with other projects. Libraries were prepared  
157 following the Illumina protocol (Illumina Inc, California, USA). PCR amplification to  
158 complete tag adapters and introduce dual index barcodes was done over 12 cycles followed by

159 purification with 0.8x AMPure XP beads (Beckman Coulter Inc, Fullerton, CA, USA).  
160 Libraries were then normalized on specific beads according to the Nextera XT protocol  
161 (Illumina Inc, San Diego, CA, USA) and pooled. Automated cluster generation and pairwise  
162 sequencing with dual-index reads were performed in 2x250 bp with the Miseq Reagent Kit  
163 (V2-500 cycles) (Illumina Inc, San Diego, CA, USA). We chose to sequence wastewater  
164 samples on a MiSeq Illumina instrument to avoid possible cross contaminations with all  
165 clinical samples received in our laboratory and routinely sequenced on the NovaSeq6000  
166 instrument.

167 Viral genomes from clinical samples were sequenced on a NovaSeq 6000 instrument  
168 (Illumina Inc., San Diego, CA, USA), as previously described [26].

169

### 170 **Sequences analysis**

171 Reads of wastewater samples were analyzed as previously described [27]. Briefly,  
172 reads from pool1 and pool2 provided by the ARTIC procedure were mapped together against  
173 the Wuhan-Hu-1 SARS-CoV-2 isolate genome (GenBank accession number NC\_045512.2)  
174 using the CLC genomics software v7.5 (Qiagen Digital Insights, Germany) with the default  
175 parameters. The non-synonymous mutations present in more than 10% of the reads were  
176 taken into account. For each sample, non-synonymous mutations were individually compared  
177 with classifying mutations that matched with 225 SARS-CoV-2 variants and sub-variants that  
178 had circulated since the beginning of the pandemics, including those that were circulating at  
179 this time, we call here the non-synonymous mutations mapped during the analysis: mutations  
180 patterns . When a mutation patterns occurred in more than one variant or sub-variant, all  
181 variants and sub-variants were added to the results (Supplementary Table 1).

182 For clinical samples, genome consensus sequences were generated with the CLC  
183 Genomics workbench v.7 by mapping on the SARS-CoV-2 genome GenBank accession  
184 no.NC\_045512.2 with the following thresholds: 0.8 for coverage and 0.9 for similarity.  
185 Sequences from complete genomes and clade assignment were analyzed using the Nextclade  
186 web-tool (<https://clades.nextstrain.org/>) [28].

187

## 188 **RESULTS**

189 Wastewater 2212 was screened positive with cycle threshold value (Ct) of 31.2 and  
190 34.4 for systems targeting the E gene and the mutation E484A respectively. Wastewater 2412

191 was also positive with Ct of 32.7 and 34.9 for systems targeting the E gene and the mutation  
192 E484A respectively.

193

194 For the sample 2212, on the 1,419,298 reads obtained, 97.3% were mapped, covering  
195 75% of the reference genome. When considering a threshold of 10%, 31 non-synonymous  
196 mutations were present, 14 of them being signature mutations of SARS-CoV-2 variants  
197 (Figure 1). Besides, P4715L and D614G present in the majority of SARS-CoV-2 variants  
198 were found in 100% of the reads. Of 27 cumulative Omicron BA.1/21K and BA.1.1  
199 subvariant mutations covered by the reads, 13 were present at a frequency ranging from 51 to  
200 100%. The following specific mutations of these subvariants K856R, S3673\_G3676S,  
201 I3758V, T547K, N856K were found. Of 20 and 32 mutation patterns of the Omicron  
202 BA.1.1.529 and BA.2/21L subvariants covered by the reads, 8 were found at a frequency  
203 ranging from 17 to 100%.

204 A total of 1,274,982 reads were obtained for the sample 2412, of which 83.7% were  
205 mapped, covering 71.6% of the reference genome. Twenty-four non-synonymous mutations  
206 were present when considering a threshold of 10%. The analysis of the reads revealed 13 non-  
207 synonymous mutation patterns specific of variants (Figure 2). D614G mutation was found in  
208 100% of the reads. Of the 34 Omicron BA.1 and BA.1.1 mutation patterns covered by the  
209 reads, 9 were present with a frequency of 36 to 100%. The K856R, S2083\_L2084delinsIle,  
210 S3673\_G3676S and T547K mutations specific of these sub-variants were found. On a total of  
211 27 and 39 mutation patterns of Omicron BA.1.1.529 and BA.2 sub-variants covered by the  
212 reads, 6 were present with a frequency ranging from 25 to 100%. Six mutation patterns  
213 specific of the Delta variant (comprising between 10 and 18 mapped mutations) were present  
214 with a frequency ranging from 11 to 100%.

215 For the aircraft that flew on December 24th, 2021, among the 56 passengers tested at  
216 the exit of the plane, by a rapid antigenic diagnostic test, 12 (21%) were detected as positive.  
217 The result was obtained in 20 minutes and directly communicated to the passengers. Among  
218 them, 11 were confirmed by RT-PCR. SARS-CoV-2 next-generation genome sequencing  
219 with the COVIDSeq protocol performed for these 11 samples provided the identification of  
220 the Omicron BA.1 variant for all.

221

222 **DISCUSSION**

223 In this work, we screened the aircraft wastewater of the flight from Ethiopia to  
224 Marseille. RT-PCR screening showed the presence of the Omicron variant. The combined  
225 ARTIC and Illumina sequencing revealed the presence of mutation patterns of the Omicron  
226 variant. Interestingly, 13 passengers from the flight of December 24th, 2021 were tested  
227 positive by rapid antigenic test and the full genome sequencing of 11 of them revealed the  
228 presence of the Omicron variant. Thus, despite a negative PCR test requirement performed in  
229 the previous 72 hours before boarding as required even for vaccinated French people, one  
230 quarter of all passengers on board were infected. Besides, the congruent results for qPCR  
231 screening and variant detection by NGS on aircraft wastewater and the genotype obtained on  
232 clinical samples showed that aircraft wastewater surveillance by NGS is efficient for  
233 monitoring the circulation of variants, and especially, a possible powerful strategy for  
234 preventing massive importation of new variants of concern from abroad.

235 Monitoring of SARS-CoV-2 circulation in wastewater has already proven to be an effective  
236 tool for tracking infections at the community level, correlated with the number of individual  
237 cases [29]. Such approach applied to the aircraft wastewater may be a powerful tool for  
238 controlling SARS-CoV-2 importation and exportation, this risk existing despite strict control  
239 measures of passengers by mandatory clinical negative testing. Recent studies have shown  
240 that SARS-CoV-2 monitoring in wastewater from international flights and cruise ships is  
241 useful to prioritize testing of onboard passengers, and to improve management of contact  
242 tracing [20;22]. Ahmed et al recently detected the Omicron variant by NGS of aircraft  
243 wastewater samples collected from flight arriving to Darwin (Australia) from Johannesburg,  
244 South Africa) [23]. They combined the ARTIC approach with the Oxford Nanopore-GridION  
245 technology and the ATOplex combined with the DNBseq-g400 sequencing. In the present  
246 study, we also detected the Omicron variant in wastewater samples from a long-haul flight  
247 from Addis-Ababa to Marseille that lasted 9 hours. One limit of this study is the possible  
248 contamination by remaining traces of SARS-CoV-2 RNA from previous flights in blackwater  
249 tanks. However, results obtained here show that this risk is very limited given the good  
250 correlation with clinical testing results. Also, SARS-CoV-2 infection was not assessed for the  
251 aircraft crew.

252 The Omicron variant was designated on November 26<sup>th</sup>, 2021 as a variant of concern by the  
253 world health organization, and described as highly transmissible, with a potential of immune  
254 escape as assessed by a reduced efficiency of the protective immunity developed after  
255 COVID-19 vaccination . Within three weeks after the first declared cases in Botswana, it had  
256 been detected in 87 countries [30]. Similarly, a previous work carried out in our laboratory



257 showed that of sixteen SARS-CoV-2 variants identified in Marseille since the beginning of  
258 pandemics, seven were imported through travel from abroad [1]. History as a lesson, to be  
259 early aware of and implement preventing measures for new potential future pandemic waves  
260 due to new emerging variants, tracking variants' circulation is indispensable. The importation  
261 in Europe of the Omicron variant from South-Africa [30] perfectly illustrates that the airway  
262 traffic is a threatening and powerful entry point for new variants despite public health policies  
263 including the green passport and the RT-PCR test required for travelers (wrong certificates).  
264 This work shows that despite a requirement of a negative RT-PCR test result performed in  
265 the previous 72 hours before crossing the border, 20% of passengers were positive,  
266 highlighting a great failing in such prevention policy. Aircraft wastewater screening can be  
267 performed in one hour, a timeframe short enough to inform passengers before custom  
268 clearance, and for triggering nasopharyngeal testing and strict quarantine until results. Such  
269 approach could be an efficient tool, probably more powerful than the mandatory certificate of  
270 negative testing that can be falsified. Aircraft and cruise wastewater monitoring may be of  
271 particular interest during inter-epidemic periods and for remote territories, for which massive  
272 importation of new SARS-CoV2 variants would have considerable public health  
273 consequences. Based on these findings, we propose wastewater SARS-CoV2 screening  
274 followed by variants' monitoring by NGS as a global strategy for preventing new SARS-  
275 CoV-2 variants importation in unaffected regions, especially in isolated territories as islands  
276 or during periods of low viral circulation. Systematic screening and NGS on aircraft, and boat  
277 wastewater may help policy makers for targeted management strategies by testing and  
278 isolating passengers in case of a positive detection of SARS-CoV-2 in wastewater.

279

## 280 **Acknowledgments**

281

## 282 **Author contributions**

283 LLT analyzed the data and wrote the manuscript. NW wrote the manuscript. AL collected the  
284 samples and performed PCR screening on wastewater and clinical samples. GP prepared  
285 samples for NGS and wrote the manuscript. PJ performed NGS and wrote the manuscript.  
286 PC revised the manuscript. BLS conceived the project, revised the manuscript and supervised  
287 the work. SA conceived data analysis, wrote the manuscript and supervised the work.

## 288 **Funding**

289 This research was funded by the French Government under the “Investissements d’avenir”  
290 (Investments for the Future) program managed by the Agence Nationale de la Recherche

291 (ANR, French National Agency for Research), reference: Méditerranée Infection 10-IAHU-  
292 03.

293 **Conflict of interest statement**

294 Lorlane Le Targa is employee of Biosellal society.

295 **Ethics**

296 Since July 2021, according to decree No. 2020-551 of 12 May 2020 on the information  
297 systems mentioned in Article 11 of Law No. 2020-546 of 11 May 2020 extending the state of  
298 health emergency for people arriving from countries classified at risk if the virus circulates  
299 actively, all passengers arriving at Marseille airport are proposed to have a naso-pharyngeal  
300 swab for SARS-CoV-2 antigenic detection according to a joint initiative of the regional  
301 prefecture and the regional health agency. Sampling and antigenic detection were performed  
302 by the bataillon des marins pompiers de Marseille. The positive samples collected for  
303 diagnostic purposes were reused for retrospective genotyping anonymously. According to  
304 French law (loi Jardé), anonymous retrospective studies do not require institutional review  
305 board approval nor informed consent. This study was approved by the Ethics Committee of  
306 the IHU Méditerranée Infection under the number 2022-013.

307

308 **FIGURE LEGENDS**

309

310 **Figure 1.** Mutation matrix, showing the mutations of the samples and the variants for which  
311 these mutations are found. The number indicated in the orange cells is the frequency of  
312 detection of the mutation. These results were obtained from the mapping of the sample 2212  
313 to the SARS-CoV-2 Wuhan-Hu-1 isolate genome (GenBank accession number  
314 NC\_045512.2) using the CLC genomics software v7.5 (Qiagen Digital Insights, Germany)  
315 with default settings. Only non-synonymous mutations present on at least 10% of reads were  
316 recovered. Variant labels include our local nomenclature (implemented at IHU Méditerranée  
317 Infection), and Nextstrain and Pangolin nomenclatures.

318

319 **Figure 2.** Mutation matrix, showing the mutations of the samples and the variants for which  
320 these mutations are found. The number indicated in the orange cases is the occurrence  
321 frequency of the detection of the mutation. These results were obtained from the mapping of  
322 the sample 2412 to the reference SARS-CoV-2 genome. (GenBank accession number  
323 NC\_045512.2) using the CLC genomics software v7.5 (Qiagen Digital Insights, Germany)  
324 with default settings. Only non-synonymous mutations present on at least 10% of reads were  
325 recovered. Variant labels include the local nomenclature (IHU) and Nextstrain, and Pangolin  
326 nomenclatures.

327

328

329 **Supplementary files**

330 **SF1.** Table of variants

331 **SF2.** Complete mutation matrix, showing all the signature mutations of the SARS-CoV2  
332 variants, for which at least one signature mutation was detected in the wastewater 2212  
333 sample. Grey cases are signature mutations of the SARS-CoV2 variant indicated in the  
334 matching line. Orange cases are signature mutations of the SARS-CoV2 variant indicated in  
335 the matching line and detected in the 2212 sample. The number indicated in the orange cases  
336 is the occurrence frequency of the detection of the mutation. These results were obtained from  
337 the mapping of the sample 2212 to the reference SARS-CoV-2 genome. (GenBank accession  
338 number NC\_045512.2) using the CLC genomics software v7.5 (Qiagen Digital Insights,  
339 Germany) with default settings. Only non-synonymous mutations present on at least 10% of

340 reads were recovered. Variant labels include the local nomenclature (IHU) and Nextstrain,  
341 and Pangolin nomenclatures.

342

343 **SF3.** Complete mutation matrix, showing all the signature mutations of the SARS-CoV2  
344 variants, for which at least one signature mutation was detected in the wastewater 2412  
345 sample. Grey cases are signature mutations of the SARS-CoV2 variant indicated in the  
346 matching line. Orange cases are signature mutations of the SARS-CoV2 variant indicated in  
347 the matching line and detected in the 2412 sample. The number indicated in the orange cases  
348 is the occurrence frequency of the detection of the mutation. These results were obtained from  
349 the mapping of the sample 2412 to the reference SARS-CoV-2 genome. (GenBank accession  
350 number NC\_045512.2) using the CLC genomics software v7.5 (Qiagen Digital Insights,  
351 Germany) with default settings. Only non-synonymous mutations present on at least 10% of  
352 reads were recovered. Variant labels include the local nomenclature (IHU) and Nextstrain,  
353 and Pangolin nomenclatures.

354

355

## Reference List

- [1] Colson P, Fournier PE, Chaudet H, Delerce J+, Giraud-Gatineau A, Houhamdi L, et al. Analysis of SARS-CoV-2 variants from 24,181 patients exemplifies the role of globalisation and zoonosis in pandemics. *medRxiv*. 2021;2021.
- [2] Wells CR, Sah P, Moghadas SM, Pandey A, Shoukat A, Wang Y, et al. Impact of international travel and border control measures on the global spread of the novel 2019 coronavirus outbreak. *Proc Natl Acad Sci USA*. 2020;117(13):7504.
- [3] Chinazzi M, Davis JT, Ajelli M, Gioannini C, Litvinova M, Merler S, et al. The effect of travel restrictions on the spread of the 2019 novel coronavirus (COVID-19) outbreak. *Science*. 2020;2020/03/06(6489):395-400.
- [4] Gonzalez-Reiche AS, Hernandez MM, Sullivan MJ, Ciferri B, Alshammary H, Obla A, et al. Introductions and early spread of SARS-CoV-2 in the New York City area. *Science*. 2020;2020/05/29(6501):297-301.
- [5] Russell TW, Wu JT, Clifford S, Edmunds WJ, Kucharski AJ, Jit M, et al. Effect of internationally imported cases on internal spread of COVID-19: a mathematical modelling study. *Lancet Public Health*. 2021;2020/12/07(1):e12-e20.
- [6] Petersen E, Koopmans M, Go U, Hamer DH, Petrosillo N, Castelli F, et al. Comparing SARS-CoV-2 with SARS-CoV and influenza pandemics. *Lancet Infect Dis*. 2020;2020/07/03(9):e238-e244.
- [7] Alberca GGF, Solis-Castro RL, Solis-Castro ME, Alberca RW. Coronavirus disease-2019 and the intestinal tract: An overview. *World J Gastroenterol*. 2021;27(13):1255-66.
- [8] Gu S, Chen Y, Wu Z, Chen Y, Gao H, Lv L, et al. Alterations of the Gut Microbiota in Patients With Coronavirus Disease 2019 or H1N1 Influenza. *Clinical Infectious Diseases*. 2020;71(10):2669-78.
- [9] Dergham J, Delerce J, Bedotto M, La Scola B, Moal Vr. Isolation of Viable SARS-CoV-2 Virus from Feces of an Immunocompromised Patient Suggesting a Possible Fecal Mode of Transmission. 2021;10(12).
- [10] Medema G, Heijnen L, Elsinga G, Italiaander R, Brouwer A. Presence of SARS-Coronavirus-2 RNA in Sewage and Correlation with Reported COVID-19 Prevalence in the Early Stage of the Epidemic in The Netherlands. *Environ Sci Technol Lett*. 2020;7(7):511-6.
- [11] Wurtzer S, Marechal V, Mouchel JM, Maday Y, Teyssou R, Richard E, et al. Evaluation of lockdown effect on SARS-CoV-2 dynamics through viral genome quantification in waste water, Greater Paris, France, 5 March to 23 April 2020. *Euro Surveill*. 2020;25(50):2000776.

- [12] Wurtz N, Lacoste A, Jardot P, Delache A, Fontaine X, Verlande M, et al. Viral RNA in City Wastewater as a Key Indicator of COVID-19 Recrudescence and Containment Measures Effectiveness. *Frontiers in microbiology*. 2021;12.
- [13] Ahmed W, Angel N, Edson J, Bibby K, Bivins A, O'Brien JW, et al. First confirmed detection of SARS-CoV-2 in untreated wastewater in Australia: A proof of concept for the wastewater surveillance of COVID-19 in the community. *Science of The Total Environment*. 2020;728:138764.
- [14] Izquierdo-Lara R, Elsinga G, Heijnen L, Munnink BBO, Schapendonk CME, Nieuwenhuijse D, et al. Monitoring SARS-CoV-2 Circulation and Diversity through Community Wastewater Sequencing, the Netherlands and Belgium. *Emerg Infect Dis*. 2021;27(5):1405-15.
- [15] Agrawal S, Orschler L, Lackner S. Metatranscriptomic Analysis Reveals SARS-CoV-2 Mutations in Wastewater of the Frankfurt Metropolitan Area in Southern Germany. *Microbiol Resour Announc*. 2021;10(15):e00280-21.
- [16] Crits-Christoph A, Kantor RS, Olm MR, Whitney ON, Al-Shayeb B, Lou YC, et al. Genome Sequencing of Sewage Detects Regionally Prevalent SARS-CoV-2 Variants. *mBio*. 2021;12(1):e02703-e02720.
- [17] Wurtz N, Revol Oa, Jardot P, Giraud-Gatineau A, Houhamdi L, Soumagnac C, et al. Monitoring the Circulation of SARS-CoV-2 Variants by Genomic Analysis of Wastewater in Marseille, South-East France. 2021;10(8).
- [18] Rios G+, Lacoux C, Leclercq V, Diamant A, Lebrigand K+, Lazuka AI, et al. Monitoring SARS-CoV-2 variants alterations in Nice neighborhoods by wastewater nanopore sequencing. *The Lancet Regional Health - Europe*. 2021;10:100202.
- [19] Wurtzer S, Waldman P, Levert M, Cluzel N, Almayrac JL, Charpentier C, et al. SARS-CoV-2 genome quantification in wastewaters at regional and city scale allows precise monitoring of the whole outbreaks dynamics and variants spreading in the population. *Science of The Total Environment*. 2022;810:152213.
- [20] Ahmed W, Bertsch PM, Angel N, Bibby K, Bivins A, Dierens L, et al. Detection of SARS-CoV-2 RNA in commercial passenger aircraft and cruise ship wastewater: a surveillance tool for assessing the presence of COVID-19 infected travellers. *Journal of Travel Medicine*. 2020;27(5):taaa116.
- [21] Albastaki A, Naji M, Lootah R, Almeheiri R, Almulla H, Almarri I, et al. First confirmed detection of SARS-COV-2 in untreated municipal and aircraft wastewater in Dubai, UAE: The use of wastewater based epidemiology as an early warning tool to monitor the prevalence of COVID-19. *Science of The Total Environment*. 2021;760:143350.
- [22] Ahmed W, Bivins A, Simpson SL, Bertsch PM, Ehret J, Hosegood I, et al. Wastewater surveillance demonstrates high predictive value for COVID-19 infection on board repatriation flights to Australia. *Environment International*. 2022;158:106938.

- [23] Ahmed W, Bivins A, Smith WJM, Metcalfe S, Stephens M, Jennison AV, et al. Detection of the Omicron (B.1.1.529) variant of SARS-CoV-2 in aircraft wastewater. *Science of The Total Environment*. 2022;153171.
- [24] Covid 19 : International travel. Ministère de l'Intérieur 2022 February 12 Available from: URL: <https://www.interieur.gouv.fr/covid-19-international-travel>
- [25] Amrane S, Tissot-Dupont H, Doudier B, Eldin C, Hocquart M, Mailhe M, et al. Rapid viral diagnosis and ambulatory management of suspected COVID-19 cases presenting at the infectious diseases referral hospital in Marseille, France, - January 31st to March 1st, 2020: A respiratory virus snapshot. *Travel Med Infect Dis*. 2020;101632.
- [26] Colson P, Lagier JC, Baudoin JP, Bou Khalil J, La Scola B, Raoult D. Ultrarapid diagnosis, microscope imaging, genome sequencing, and culture isolation of SARS-CoV-2. *European Journal of Clinical Microbiology & Infectious Diseases*. 2020;39(8):1601-3.
- [27] Wurtz N, Revol Oa, Jardot P, Giraud-Gatineau A, Houhamdi L, Soumagnac C, et al. Monitoring the Circulation of SARS-CoV-2 Variants by Genomic Analysis of Wastewater in Marseille, South-East France. 2021;10(8).
- [28] Aksamentov I, Roemer C, Hodcroft EB, Neher R. Nextclade: clade assignment, mutation calling and quality control for viral genomes. *Journal of Open Source Software*. 2021;6(67).
- [29] Fernandez-Cassi X, Scheidegger A, Banziger C, Cariti F, Tunas CA, Ganesanandamoorthy P, et al. Wastewater monitoring outperforms case numbers as a tool to track COVID-19 incidence dynamics when test positivity rates are high  
1. *Water Res*. 2021;200:117252.
- [30] Viana R, Moyo S, Amoako DG, Tegally H, Scheepers C, Althaus CL, et al. Rapid epidemic expansion of the SARS-CoV-2 Omicron variant in southern Africa. *Nature*. 2022.





**Fig.2**

| WHO Label | NEXTCLADE       | Amino acid (nucleotide) Genes | S2083_L2084delinsI (AGTT6512A) ORF1a | P3395H (C10449A) ORF1a | T3646A (A11201G) ORF1a | S3673_G3676delinsS (AGTTTGTCTG11282A) ORF1a | L3674* (GTCTGGTTTT11287G) ORF1a | G5063S (G15451A) ORF1b | L452R (T22917G) Gene S | T478K (C22995A) Gene S | T547K (C23202A) Gene S | D614G (A23403G) Gene S | P13L (C28311T) Gene N | G30_S33delinsG (GGAGAACGCA28361G) Gene N | D63G (A28461G) Gene N | Number of hallmark mutations detected |
|-----------|-----------------|-------------------------------|--------------------------------------|------------------------|------------------------|---------------------------------------------|---------------------------------|------------------------|------------------------|------------------------|------------------------|------------------------|-----------------------|------------------------------------------|-----------------------|---------------------------------------|
|           |                 | Lignage P.                    | IHU                                  |                        |                        |                                             |                                 |                        |                        |                        |                        |                        |                       |                                          |                       |                                       |
|           | 19B             | A.19                          | 19B                                  |                        |                        |                                             |                                 |                        |                        |                        |                        | 100                    |                       |                                          |                       | 1/2                                   |
|           | 20A             | B.1                           | 20A                                  |                        |                        |                                             |                                 |                        |                        |                        |                        | 100                    |                       |                                          |                       | 1/2                                   |
| Mu        | 21H ( Mu )      | B.1.621                       | 21H                                  |                        |                        |                                             |                                 |                        |                        |                        |                        | 100                    |                       |                                          |                       | 1/12                                  |
|           | 20C             | B.1                           | 20C                                  |                        |                        |                                             |                                 |                        |                        |                        |                        | 100                    |                       |                                          |                       | 1/6                                   |
|           | 20G             | B.1.2                         | 20G                                  |                        |                        |                                             |                                 |                        |                        |                        |                        | 100                    |                       |                                          |                       | 1/8                                   |
| Beta.V2   | 20H ( Beta.V2 ) | B.1.351                       | SudAfricain                          |                        |                        |                                             | 25                              |                        |                        |                        |                        | 100                    |                       |                                          |                       | 2/12                                  |
| Epsilon   | 21C ( Epsilon ) |                               | 21C                                  |                        |                        |                                             |                                 | 99                     |                        |                        |                        | 100                    |                       |                                          |                       | 2/8                                   |
| Iota      | 21F ( Iota )    |                               | 21F                                  |                        |                        |                                             | 25                              |                        |                        |                        |                        | 100                    |                       |                                          |                       | 2/7                                   |
|           | 20B             | B.1.1                         | 20B                                  |                        |                        |                                             |                                 |                        |                        |                        |                        | 100                    |                       |                                          |                       | 1/5                                   |
|           | 20D             | B.1.1.1                       | 20D                                  |                        |                        |                                             |                                 |                        |                        |                        |                        | 100                    |                       |                                          |                       | 1/6                                   |
| Lambda    | 21G ( Lambda )  | C.37                          | 21G                                  |                        |                        |                                             | 25                              |                        |                        |                        |                        | 100                    | 93                    |                                          |                       | 3/16                                  |
|           | 20F             | D.2                           | 20F                                  |                        |                        |                                             |                                 |                        |                        |                        |                        | 100                    |                       |                                          |                       | 1/6                                   |
| Alpha.V1  | 20I ( Alpha.V1) | B.1.1.7                       | Anglais                              |                        |                        |                                             | 25                              |                        |                        |                        |                        | 100                    |                       |                                          |                       | 2/17                                  |
| Gamma.V3  | 20J ( Gamma.V3) | P.1                           | Bresilien                            |                        |                        |                                             | 25                              |                        |                        |                        |                        | 100                    |                       |                                          |                       | 2/16                                  |
| Theta     | 21E ( Theta )   | P.3                           | 21E                                  |                        |                        |                                             |                                 |                        |                        |                        |                        | 100                    |                       |                                          |                       | 1/15                                  |
| Omicron   | 21M ( Omicron ) | B.1.1.529                     | 21M                                  | 91                     |                        |                                             | 25                              |                        | 100                    |                        |                        | 100                    | 93                    | 69                                       |                       | 6/27                                  |
| Omicron   | 21L ( Omicron ) | BA.2                          | 21L                                  | 91                     |                        |                                             | 25                              |                        | 100                    |                        |                        | 100                    | 93                    | 69                                       |                       | 6/39                                  |
| Omicron   | 21K ( Omicron ) | BA.1                          | 21K                                  | 73                     | 91                     | 36                                          |                                 |                        | 100                    | 86                     |                        | 100                    | 93                    | 69                                       |                       | 8/34                                  |
| Omicron   | 21K ( Omicron ) | BA.1.1                        | 21K                                  | 73                     | 91                     | 36                                          |                                 |                        | 100                    | 86                     |                        | 100                    | 93                    | 69                                       |                       | 8/34                                  |
|           | 20E             | B.1.177                       | 20E                                  |                        |                        |                                             |                                 |                        |                        |                        |                        | 100                    |                       |                                          |                       | 1/2                                   |
| Eta       | 21D ( Eta )     | B.1.525                       | Marseille484K.V3                     |                        |                        |                                             | 25                              |                        |                        |                        |                        | 100                    |                       |                                          |                       | 2/15                                  |
|           |                 | B.1.617                       | Indien                               |                        |                        |                                             |                                 |                        | 99                     |                        |                        | 100                    |                       |                                          |                       | 2/6                                   |
| Delta     | 21A ( Delta )   | B.1.617.2                     | Indien484E.V2                        |                        |                        |                                             |                                 |                        | 99                     | 100                    |                        | 100                    |                       | 17                                       |                       | 4/10                                  |
| Delta     | 21I ( Delta )   | B.1.617.2                     | 21I.IND                              |                        |                        |                                             |                                 | 11                     | 99                     | 100                    |                        | 100                    |                       | 17                                       |                       | 5/15                                  |
| Delta     | 21J ( Delta )   | B.1.617.2                     | 21J.IND                              |                        |                        | 11                                          |                                 | 11                     | 99                     | 100                    |                        | 100                    |                       | 17                                       |                       | 7/18                                  |
| Kappa     | 21B ( Kappa )   | B.1.617.1                     | Indien484Q.V1                        |                        |                        | 11                                          |                                 |                        | 99                     |                        |                        | 100                    |                       |                                          |                       | 3/10                                  |
